# Supplementary material for: In Vitro Susceptibility of Cryptosporidium parvum to Plant Antiparasitic Compounds
Source: MDPI journal article supplement (doi:10.3390/pathogens12010061), 2022-12-30
Supplement: s1 [file s1]

**Table S1. Mean % Cell viability of HCT-8 cells exposed to plant extracts**

|                                                         | Mean % Cell Viability ( $\pm$ SEM) |                  |                  |                  |                  |                  |
|---------------------------------------------------------|------------------------------------|------------------|------------------|------------------|------------------|------------------|
|                                                         | Concentration ( $\mu\text{g/mL}$ ) |                  |                  |                  |                  |                  |
|                                                         | 2.05                               | 6.16             | 18.5             | 55.5             | 166              | 500              |
| <i>Allium sativum</i> L. (garlic)                       | 97.34 $\pm$ 1.05                   | 95.79 $\pm$ 0.19 | 95.11 $\pm$ 0.19 | 96.13 $\pm$ 0.53 | 96.13 $\pm$ 0.77 | 98.48 $\pm$ 0.90 |
| <i>Boswellia serrata</i> Roxb.<br>(Indian frankincense) | 97.13 $\pm$ 1.44                   | 98.25 $\pm$ 0.91 | 98.38 $\pm$ 1.05 | 98.17 $\pm$ 1.54 | 96.73 $\pm$ 1.39 | 97.34 $\pm$ 1.04 |
| <i>Centella asiatica</i> (L.) urban<br>(Gotu kola)      | 99.78 $\pm$ 0.27                   | 98.51 $\pm$ 0.86 | 96.09 $\pm$ 0.80 | 98.75 $\pm$ 1.25 | 98.10 $\pm$ 1.14 | 98.98 $\pm$ 0.60 |
| <i>Cucurbita pepo</i> L. (pumpkin)                      | 88.01 $\pm$ 1.91                   | 90.91 $\pm$ 1.40 | 91.83 $\pm$ 1.18 | 86.79 $\pm$ 0.81 | 93.15 $\pm$ 1.04 | 88.14 $\pm$ 0.58 |
| <i>Curcuma longa</i> L. (turmeric)                      | 97.14 $\pm$ 1.46                   | 92.71 $\pm$ 0.67 | 96.26 $\pm$ 1.40 | 93.17 $\pm$ 0.73 | 97.08 $\pm$ 1.20 | 97.47 $\pm$ 0.88 |
| <i>Embelia ribes</i> Burm. f. (false<br>black pepper)   | 97.07 $\pm$ 0.34                   | 96.07 $\pm$ 2.19 | 93.71 $\pm$ 1.00 | 93.04 $\pm$ 1.18 | 95.68 $\pm$ 2.63 | 94.05 $\pm$ 0.80 |
| <i>Glycyrrhiza glabra</i> L.<br>(liquorice)             | 87.37 $\pm$ 1.04                   | 89.31 $\pm$ 1.40 | 89.75 $\pm$ 1.26 | 93.69 $\pm$ 1.65 | 93.30 $\pm$ 1.09 | 91.77 $\pm$ 0.47 |

|                                                          |              |              |              |              |              |              |
|----------------------------------------------------------|--------------|--------------|--------------|--------------|--------------|--------------|
| <i>Moringa oleifera</i> Lam.<br>(drumstick)              | 89.39 ± 1.13 | 85.21 ± 0.54 | 89.13 ± 1.50 | 86.06 ± 1.01 | 89.87 ± 1.58 | 92.14 ± 0.40 |
| <i>Nigella Sativa</i> L. (black<br>cumin)                | 98.56 ± 1.44 | 99.53 ± 0.47 | 96.69 ± 1.72 | 94.97 ± 2.52 | 93.46 ± 2.43 | 98.13 ± 1.87 |
| <i>Piper nigrum</i> L. (black<br>pepper)                 | 99.04 ± 0.51 | 96.05 ± 1.98 | 95.79 ± 2.26 | 97.28 ± 0.56 | 99.28 ± 0.72 | 98.79 ± 1.21 |
| <i>Thymus vulgaris</i> L. (thyme)                        | 98.83 ± 0.23 | 96.98 ± 0.97 | 96.56 ± 1.79 | 98.77 ± 1.23 | 99.40 ± 0.60 | 98.62 ± 0.81 |
| <i>Tribulus terrestris</i> L. (goat's-<br>head/ caltrop) | 97.72 ± 1.18 | 96.26 ± 1.49 | 99.03 ± 0.97 | 98.88 ± 1.12 | 94.87 ± 2.62 | 99.57 ± 0.43 |
| <i>Vitex negundo</i> L. (Chinese<br>chaste tree)         | 97.55 ± 1.92 | 99.39 ± 0.61 | 97.24 ± 1.43 | 98.35 ± 1.07 | 99.18 ± 0.82 | 96.49 ± 1.80 |
| Trifluralin                                              | 84.18 ± 2.98 | 84.24 ± 2.50 | 84.16 ± 1.68 | 85.31 ± 1.77 | 86.74 ± 1.31 | 86.21 ± 2.98 |
